# Supplementary material
Source: PubMed Central journal article supplement (PMC5831403)
Supplement: NIHMS943615-supplement-supplement_1.pdf [file NIHMS943615-supplement-supplement_1.pdf]

**Supplemental Table 1. Facility Characteristics**

|                                                        | <b>Facility 1</b> | <b>Facility 2</b> | <b>Facility 3</b> | <b>Facility 4</b> | <b>Facility 5</b> | <b>Facility 6</b> |
|--------------------------------------------------------|-------------------|-------------------|-------------------|-------------------|-------------------|-------------------|
| Number of beds                                         | 74                | 143               | 103               | 72                | 133               | 102               |
| Ownership                                              | For-Profit        | For-Profit        | For-Profit        | For-Profit        | For-Profit        | For-Profit        |
| Star rating<br>(Nursing Home Compare, 2013)            | 5                 | 2                 | 4                 | 4                 | 4                 | 3                 |
| Number of patients eligible                            | 260               | 195               | 356               | 290               | 132               | 151               |
| No. (%) enrolled                                       | 132 (50.8)        | 82 (42.1)         | 169 (47.5)        | 137 (47.2)        | 54 (40.9)         | 76 (50.3)         |
| No. (%) male                                           | 60 (45.5)         | 31 (37.8)         | 68 (40.2)         | 47 (34.3)         | 29 (53.7)         | 39 (51.3)         |
| No. (%) admitted following<br>acute care hospital stay | 127 (96.2)        | 77 (93.9)         | 161 (95.3)        | 129 (94.2)        | 54 (100.0)        | 69 (90.8)         |
| Mean (SD) days follow-up per<br>patient                | 20.3 (39.0)       | 42.7 (56.3)       | 26.0 (40.5)       | 25.9 (36.7)       | 30.0 (35.6)       | 39.0 (56.9)       |

**Supplemental Table 2. Predictors of MDRO colonization among patients enrolled within 3 days of admission (N=175)**

| Characteristic                                          | Patient Colonization <sup>a</sup> |                                                                  |                              |                                |                              |
|---------------------------------------------------------|-----------------------------------|------------------------------------------------------------------|------------------------------|--------------------------------|------------------------------|
|                                                         | No Colonization<br>[n=277]        | No Hand Colonization, Other<br>Body Site(s) Colonized<br>[n=204] |                              | Hands Colonized<br>[n=164] (%) |                              |
|                                                         | n (%)                             | n (%)                                                            | Multivariate<br>RRR (95% CI) | n (%)                          | Multivariate<br>RRR (95% CI) |
| Age, mean (SD)                                          | 72.9 (12.7)                       | 75.9 (9.2)*                                                      | 1.02 (1.00-1.05)**           | 74.9 (10.2)                    | 1.02 (0.99-1.05)             |
| Male                                                    | 31 (39.2)                         | 24 (42.9)                                                        | 1.23 (0.66-2.31)             | 26 (65.0)*                     | 3.28 (2.15-5.00)**           |
| Charlson Comorbidity Score, mean(SD)                    | 2.5 (2.2)                         | 2.6 (2.1)                                                        | NA                           | 3.1 (2.2)                      | NA                           |
| Cognitive Sum Score, mean(SD) <sup>b,d</sup>            | 13.9 (2.1)                        | 14.1 (1.7)                                                       | 1.11 (0.87-1.42)             | 12.8 (3.7)*                    | 0.97 (0.91-1.04)             |
| Physical Self Maintenance Score, mean (SD) <sup>c</sup> | 12.4 (3.4)                        | 13.3 (4.1)                                                       | 1.03 (0.95-1.12)             | 15.0 (4.5)*                    | 1.19 (1.12-1.27)**           |
| Feeding Disability                                      | 1 (1.3)                           | 4 (7.1)                                                          | NA                           | 0 (0)                          | NA                           |
| Bathing Disability                                      | 29 (36.7)                         | 25 (44.6)                                                        | 1.23 (0.60-2.53)             | 21 (52.5)*                     | 1.80 (0.81-3.99)             |
| Ambulation Disability                                   | 41 (51.9)                         | 29 (51.8)                                                        | 0.95 (0.54-1.69)             | 30 (75.0)*                     | 3.38 (2.38-4.80)**           |
| Toileting Disability                                    | 10 (12.7)                         | 12 (21.4)*                                                       | 1.23 (0.59-2.58)             | 16 (40.0)*                     | 4.29 (2.01-9.15)**           |
| Dressing Disability                                     | 40 (50.6)                         | 31 (55.4)                                                        | 1.05 (0.67-1.64)             | 27 (67.5)*                     | 1.99 (1.60-2.47)**           |
| Grooming Disability                                     | 12 (15.2)                         | 7 (12.5)                                                         | 0.60 (0.31-1.15)             | 12 (30.0)*                     | 1.73 (0.71-4.25)             |
| Urinary Catheter                                        | 3 (3.8)                           | 6 (10.7)                                                         | 2.16 (0.41-11.49)            | 6 (15.0)*                      | 1.32 (0.22-7.83)             |
| Feeding Tube                                            | 1 (1.3)                           | 2 (3.6)                                                          | NA                           | 0 (0)                          | NA                           |
| Peripherally-inserted central venous catheter           | 10 (12.7)                         | 8 (14.3)                                                         | 1.03 (0.17-6.21)             | 6 (15.0)*                      | 1.39 (0.28-6.98)             |
| Antibiotic Use in previous 30 days <sup>d</sup>         | 43 (56.6)                         | 38 (69.1)                                                        | 1.79 (0.83-3.86)             | 28 (71.8)*                     | 2.00 (1.33-3.00)**           |
| Diabetes                                                | 35 (44.3)                         | 25 (44.6)                                                        | NA                           | 23 (57.5)                      | NA                           |
| Dementia <sup>d</sup>                                   | 6 (7.6)                           | 5 (8.9)                                                          | NA                           | 7 (17.5)                       | NA                           |
| Prolonged Hospital Stay (>2 weeks)                      | 4 (5.1)                           | 3 (5.4)                                                          | 0.98 (0.17-5.69)             | 5 (12.5)*                      | 2.95 (0.72-12.07)            |

<sup>a</sup> N=175

<sup>b</sup> Possible Cognitive Sum Score range, 0 to 15, higher scores indicating higher cognitive function.

<sup>c</sup> Possible Physical Self Maintenance Score range, 6 to 30, higher scores indicating more functional disability.

<sup>d</sup> These variables had missing data. The totals for each are: cognitive sum score, n=166; antibiotic use, n=170. For multivariate analyses, missing values were assigned as the population average (cognitive score) or zero (antibiotic use), and missing controls were added.

\* These variables were significant at  $P < .05$  in clustered univariate analysis and included in the adjusted model. Disability variables are collinear; adjusted RRRs for these do not include other disability variables.

\*\* These variables were significant at  $P < .05$  in clustered multivariate analysis.

**Supplemental Table 3. Fluidity of colonization among patients with  $\geq 60$  days of follow-up (N=93)**

|                                                    | MRSA             | VRE              | RGNB             |
|----------------------------------------------------|------------------|------------------|------------------|
| <b>Patients with hand colonization, N(%)</b>       | <b>30 (32.3)</b> | <b>37 (39.8)</b> | <b>26 (28.0)</b> |
| Patients with pre-existing hand colonization, n(%) | 10 (33.3)        | 22 (59.5)        | 6 (23.1)         |
| Persistent <sup>a</sup> , n(%)                     | 4 (40.0)         | 5 (22.7)         | 0 (0)            |
| Intermittent <sup>b</sup> , n(%)                   | 6 (60.0)         | 17 (77.3)        | 6 (100)          |
| Patients with acquired hand colonization, n(%)     | 20 (66.7)        | 15 (40.5)        | 20 (76.9)        |
| Persistent <sup>a</sup> , n(%)                     | 8 (40.0)         | 5 (33.3)         | 3 (15.0)         |
| Intermittent <sup>b</sup> , n(%)                   | 12 (60.0)        | 10 (66.7)        | 17 (85.0)        |

<sup>a</sup> Colonization was considered persistent if one or less negative hand swabs between positive swabs.

<sup>b</sup> Colonization was considered intermittent if positive swabs were separated by at least two negative samples.
